# Bridging traditional evolutionary game theory and metabolic models for predicting Nash equilibrium of microbial metabolic interactions

Jingyi Cai <sup>1</sup>, Tianwei Tan<sup>1,\*</sup>, Siu Hung Joshua Chan<sup>2,\*</sup>,

**1 National R&D Center for Biorefinery, Beijing University of Chemical Technology, Beijing 100029, China**

**2 Department of Chemical and Biological Engineering, Colorado State University, Fort Collins, CO 80523, USA**

\*Tianwei Tan: [twtan@mail.buct.edu.cn](mailto:twtan@mail.buct.edu.cn) \*Siu Hung Joshua Chan: [Joshua.Chan@colostate.edu](mailto:Joshua.Chan@colostate.edu),

## Abstract

Inter-cellular interactions are ubiquitous in the world of microbes, shaping the population composition of ecosystems at both microscopic and macroscopic scales, affecting human health and governing processes in utilization of bio-resources. However, metabolite exchanges, a major type of microbial interactions, remain difficult to measure and predict, invoking the urgent need of modeling and computational studies. As an alternative to the conventional ecological models which usually lack metabolic details, metabolic models and flux-balance-analysis (FBA) based algorithms emerge as a promising way to address the challenge. However, existing algorithms for predicting microbial community metabolism usually impose constraints or objective functions (implicitly or explicitly) that lead to 'forced altruism', which forces a microbe to fulfill other species's need by cross feeding certain metabolites instead of using the resource for its own reproduction and other cellular activities in order to achieve community level optimality. As a result, in terms of game theory, the prediction is not necessarily a Nash equilibrium and therefore not evolutionarily stable. We developed a bi-level optimization framework free of 'forced altruism' constraints termed NECom. Payoff matrices of metabolic strategies analogous to traditional matrix games can be obtained by shadow price analysis in FBA to validate NECom predictions. By applying NECom to toy community models, we demonstrate several classical games between microbes in terms of metabolic interactions, including prisoner's dilemma and positive frequency-dependent cooperation. The results provide insights into why microbes may not prefer

cooperation even if it is mutual beneficial, and why sometimes mutualism is still favorable when the resource investment seemingly contradicts to a microbe's fitness, demonstrating NECom a promising tool to reveal metabolic mechanisms of microbial interactions. The novel tools reported in this paper bridge traditional evolutionary game theory and metabolic models for better analysis of microbial metabolic interaction.

## Introduction

In nature, microorganisms seldom exist in isolate form. Instead, they form communities governed by different types of interactions, which play essential roles in adaptation to environment [13,37,47] and evolution of species [8,28,29,40,49]. Beside the theoretical importance, microbial interactions are also a key topic in applications from medicine intermediate synthesis [7,64] to remediation of gut microbiome for human health [17,33,53,55], from degradation of cellulose for biorefinery [34,43,69] to microbial power generation [38]. Among microbial interactions, exchange of metabolites is especially important and arguably responsible for the fact that more than 99% of bacterial species are not cultivable [31,47,50]. Understanding metabolic interactions is a fundamental task in life science. Despite continual progresses in determining metabolite exchanges using experimental approach such as spatially separated apparatus designs [44,63], isotope probing [1,59] and tracing [16] techniques, 16s RNA analysis [62] and metabolome analysis [42], we still need governing principles to predict and understand these metabolic interactions.

Benefiting from the advancement in genome-scale metabolic models [36], the application of constraint-based modeling to microbial communities have started since a decade ago [54]. Solutions have been proposed while new challenges emerged in the process. Joint flux balance analysis (Joint-FBA) was first introduced to model a microbial community as a 'super' organism containing the compartments for each organism and an additional compartment for inter-cellular metabolite exchange [14,54]. The total community biomass was maximized to predict metabolism in Joint-FBA. Methods based on Joint-FBA for analyzing host-microbe and microbe-microbe interactions were also developed and widely applied to the gut microbiome [22–24,39]. Later FBA were adapted for modeling dynamic metabolism of microbial co-culture [20,65]. Succeeding efforts include seeking better ways to select particular solutions among equivalent optima in each time step to ensure a well-conditioned dynamical system [18,60] and incorporating spatiotemperol elements [3,21,25,26]. In order to reconcile the community and individual objective functions, OptCom, a bilevel optimization algorithm was developed to optimize the individual fitness in the inner problem, while optimizing community fitness in the outer problem [66]. To address the effect of viable abundance on the inter-cellular fluxes at population steady state, community FBA (cFBA) [35] generalized joint-FBA by adding parameterized abundances as weights to exchange fluxes. SteadyCom [6] as a reformulation of cFBA enabled efficient

computation for flux variability analysis and other constraint based modeling techniques for communities 48  
with a large number of organisms. In recent years, researchers have started to simulate communities with a 49  
large number of species [27, 52] or handle a large quantity of scenarios [46, 61, 67]. Joint-FBA and its linear 50  
derivatives are usually employed to avoid intractable computation. However, in most static FBA-based 51  
algorithms, some constraints and the community objective function might force individual organisms to 52  
produce a certain amount of metabolites for other members prior to optimizing its own fitness whenever 53  
doing so the community level objective is optimal. We call this 'forced altruism'. We believe that forced 54  
altruism is potentially applicable to microbes that are physically connected, e.g., by nanotubes [9, 48] or to 55  
endosymbiosis, since inter-cellular exchange under these situations are likely governed by concentration 56  
gradients or regulation by the host, respectively. In general for microbes in a co-culture that are separate 57  
from each others by cell envelopes and are not controlled by higher level regulatory mechanisms (e.g., 58  
host-regulation, quorum sensing etc), however, the applicability of 'forced altruism' constraints should be 59  
questioned because microbe cells with higher individual fitness would usually be favored by selection. 60  
Consequently, as a necessary condition for evolutionary stability, true Nash equilibria (NE) in community 61  
metabolic networks should be the targets to identify, in which each microbe maximizes its fitness function in 62  
the given environment. In context of community metabolic networks, the microbial game is significantly 63  
different from those studied previously which treat a single microbial cell as the basic unit with ad-hoc 64  
metabolic details [2, 4, 5, 15, 19, 30, 32]. Instead, in community metabolic networks, each microbe is 65  
represented as the sum of its constituent biomacromolecules synthesized from the network. The available 66  
strategies for each player are any possible flux distributions (the entire set of reaction fluxes) satisfying 67  
biochemical principles and constrained by substrate availability, which depends not only on the nutrients in 68  
the environment but also the strategies of other players in terms of the cross feeding metabolites they may 69  
produce [51]. The metabolic details, continuous flux space and interdependence of available strategies 70  
between players characterize a unique class of microbial games in community metabolic networks which 71  
require novel game-theoretical methods. In this paper we firstly introduce a method called 'FShap', to 72  
construct the payoff matrices of two interactive species with the solution of Flux Balance Analysis, so that 73  
the Nash equilibria can be obtained by traditional payoff matrix analysis, then We introduce a bi-level mixed 74  
integer optimization framework free of forced altruism termed NECom. Based on toy models representing 75  
classical games in the context of community metabolic networks, the predictions of FShap and NECom will 76  
be compared. The strategies predicted by NECom will be proved to be Nash equilibria (NE) and the 77  
community objective function can be set to find potential strong Nash equilibria and Evolutionary Stable 78  
Strategies (ESS), a NE not invadable by alternative strategies. 79

## Result and Discussion

80

### Developing FShaP, the FBA Shadow price based Payoff matrix

81

In traditional game theory, payoffs for each species involved in the metabolic inter-cellular interactions can be computed as the benefits of importing metabolites subtracting the costs of exporting metabolites. But how can we use metabolic model to obtain the benefits and costs? The answer was found in the solution of flux balance analysis (FBA) [45], specifically, the shadow price of lower bound constraint of exchange reactions. Before recalling the FBA algorithm, let  $N$  be the set of organisms in a microbial community, for each organism  $n \in N$ , let  $I_n$  be the set of metabolites and  $J_n$  be the set of reactions,  $\mathbf{c}_n$  be the objective indicator vector, in which 1 indicates the corresponding flux variable  $v_{j,n} \in V_n$  of reaction  $j$  is the objective and 0 for otherwise.

82

83

84

85

86

87

88

89

$$\max \mathbf{c}_n V_n$$

subject to

$$\sum_{j \in J_n} S_{i,j,n} v_{j,n} = 0 \quad \forall i \in I_n, \forall n \in N \quad (1)$$

$$v_{j,n} \geq LB_{j,n}, \quad \forall j \in J_n, \forall n \in N \quad (2)$$

$$-v_{j,n} \geq -UB_{j,n}, \quad \forall j \in J_n, \forall n \in N \quad (3)$$

$$v \in \mathbb{R}$$

where  $S_{i,j,n}$  is the stoichiometry of metabolite  $i$  for reaction  $j$ ,  $LB_{j,n}$  and  $UB_{j,n}$  are the lower bound and upper bound for the flux of reaction  $j$ , respectively. All subscripts  $n$  stand for organism  $n$ . From the primal problem, the dual problem of FBA can be derived as:

$$\min \sum_{j \in J_n} (UB_{j,n} \mu_{j,n} - LB_{j,n} \mu_{j,n})$$

subject to

$$\sum_{i \in I_n} S_{i,j,n} \lambda_{i,n} + \mu_{j,n}^{UB} - \mu_{j,n}^{LB} = c_{j,n}, \quad \forall j \in J_n, \forall n \in N \quad (4)$$

$$\mu^{LB}, \mu^{UB} \geq 0, \lambda \in \mathbb{R}$$

Where  $\mu_{LB}$  and  $\mu_{UB}$  are the shadow price for the lower bounds constraints eq. (2) and the upper bounds constraints eq. (3) respectively,  $\lambda_n$  are the dual variable for eq. (1).

90

91

By the definition in linear programming, shadow price of a constraint is how the optimal value of objective changes in response to marginal variation of the right-hand-side of the constraint. Therefore as to a specific exchange reaction  $com(i, n) \in J^{ex}$ , the shadow price  $\mu_{com(i,n),n}^{LB}$  is the amount of fitness increases (or the benefit) of organism  $n$  in response to one (marginal) unit increase of  $-LB_{com(i,n),n}$ , the maximum uptake rate of metabolite  $i$  by organism  $n$ ,  $\mu_{com(i,n),n}^{LB}$  can also be regarded as the cost when organism  $n$  export metabolite  $i$ . Considering a classical two-member game, the payoff matrix fig. 1 can be constructed with the payoffs calculated with the cost and benefit obtained from the solution of dual problem of FBA, using eq. (5) and eq. (6)

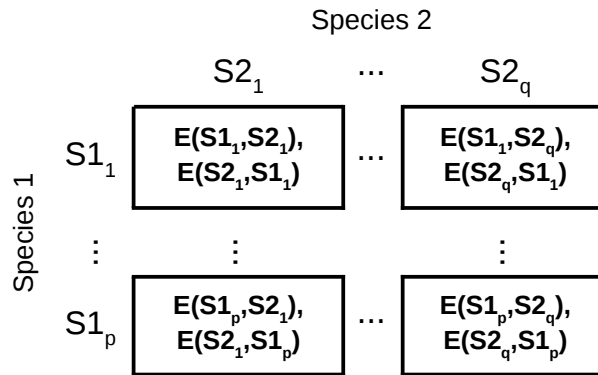

**Figure 1.** The general layout of payoff matrix of two interactive organisms, in each cell there are two payoffs,  $E(S1_p, S2_q)$  is the payoff for species 1 when interacting with species 2, and they carry strategy combo No.p and No.q respectively,  $E(S2_q, S1_p)$  is the payoff for species 2 when interacting with species 1, and they carry strategy combo No.q and No.p respectively

Given specific metabolite exchange state, payoff values for individual organism in a the two-member game can be computed as:

$$E(S1_p, S2_q) = - \overbrace{\sum_{i \in I^{ex}} (\mu_{com(i,1),1}^{LB} S1_{i,p})}^{\text{cost of export}} + \overbrace{\sum_{i \in I^{ex}} (\mu_{com(i,1),1}^{LB} S2_{i,p})}^{\text{benefit of import}} \quad i \in I^{ex}, p, q \in P \quad (5)$$

$$E(S2_q, S1_p) = - \sum_{i \in I^{ex}} (\mu_{com(i,2),2}^{LB} S2_{i,p}) + \sum_{i \in I^{ex}} (\mu_{com(i,2),2}^{LB} S1_{i,p}) \quad i \in I^{ex}, p, q \in P \quad (6)$$

where  $S1, S2$  are strategy indicator vectors for the two species respectively, with 1 for activation and 0 for inactivation (e.g  $S1_2 = [1, 0]$  means the strategy combo No.2 for species 1 is activated for metabolite 1 but not for metabolite 2, and  $S1_{i,2}$  is the strategy indicator for metabolite  $i$  in  $S1_2$ ).

## Steps to develop NECom, the Nash Equilibrium predictor for microbial Community)

In this section we derive the bi-level optimization framework NECom, starting with the description of flux balance analysis (FBA) as the inner problem for optimizing the fitness of individual organisms. A set of outer-level variables to indicate the availability of metabolites for uptake are then introduced to connect the inner-level flux variable.

Let  $I_n^{ex}$  be the set of extracellular metabolites in the community,  $J_n^{ex} \subseteq J_n$  be the set of exchange reactions between the community and organism  $n$ . Define an index mapping functions  $I_n^{ex} \rightarrow J_n^{ex}$  such that  $com(i, n) \in J_n^{ex}$  map extracellular metabolite  $i \in I_n^{ex}$  to its corresponding exchange reaction. For each individual organism, we split the exchange reaction flux for a possible cross-feeding metabolite  $v_{com(i,n),n}$  into two non-negative continuous variable: the uptake rate  $v_{com(i,n),n}^{ut}$  and the export rate  $v_{com(i,n),n}^{ex}$ :

$$v_{com(i,n),n} + v_{com(i,n),n}^{ut} - v_{com(i,n),n}^{ex} = 0 \quad \forall i \in I_n^{ex}, \forall n \in N$$

To explicitly model the mutual dependency in terms of inter-organism metabolite exchange, uptake of a metabolite by an organism is possible only if there is surplus of the metabolite in the medium after the consumption/production by the rest of the community:

$$X_n v_{com(i,n),n}^{ut} \leq \max\{v_i^{med} + \sum_{k \in N, k \neq n} X_k v_{com(i,n),n}, 0\} \forall i \in I_n^{ex}, \forall n \in N \quad (7)$$

where  $X_n$  is the relative abundance of organism  $n$  (a pre-set parameter), which is multiplied by specific uptake rate  $v_{com(i,n),n}^{ut}$  to correctly normalize the exchange with the community, and  $v_i^{med}$  is the maximum community uptake of metabolite  $i$  from the medium. Here to avoid forced altruism,  $v_{com(i,n),n}^{ex}$  is designated as an inner variable independent of the outer problem, while the uptake rate  $v_{com(i,n),n}^{ut}$  is also an inner variable but depends on the net availability of metabolite  $i$ . In this way we can ensure that individual organisms have 'autonomy' over their metabolite exports. Maximization of the community fitness in the outer level cannot force an organism to produce a certain metabolite unless FBA determines that the metabolite is necessary for, or at least not undermining the maximum growth of the organism. The max function in the

eq. (7) is linearized by introducing an outer continuous variable  $\beta_{i,n}$  and an outer binary variable  $\delta_{i,n}$ :

$$\left[ \begin{array}{l} \beta_{i,n} \geq v_i^{med} + \sum_{k \in N, k \neq n} X_k v_{com(i,n),n} \\ \beta_{i,n} \leq (1 - \delta_{i,n})M + v_i^{med} + \sum_{k \in N, k \neq n} X_k v_{com(i,n),n} \\ \beta_{i,n} \leq \delta_{i,n}M \\ \beta_{i,n} \geq 0 \end{array} \right] \forall i \in I_n^{ex}, \forall n \in N \quad (8)$$

where  $M$  is a large constant. In combination of inner problem and outer problem the complete formulation of NECom can be written as:

$$NECom \quad (9)$$

$$\left[ \begin{array}{l} \max \quad v_n^{biomass} \\ \text{subject to} \\ \sum_{j \in J_n} S_{i,j,n} v_{j,n} = 0, \quad \forall i \in I^n \\ LB_{j,n} \leq v_{j,n} \leq UB_{j,n} \quad \forall j \in J_n \\ v_{com(i,n),n} + v_{com(i,n),n}^{ut} - v_{com(i,n),n}^{ex} = 0 \quad \forall i \in I_n^{ex} \\ X_n v_{com(i,n),n}^{ut} \leq \beta_{i,n} \quad \forall i \in I_n^{ex} \end{array} \right] \forall n \in N \quad (10)$$

$$\beta_{i,n} \geq v_i^{med} + \sum_{k \in N, k \neq n} X_k v_{com(i,k),k} \quad \forall i \in I_n^{ex} \quad (11)$$

$$\beta_{i,n} \leq \delta_{i,n}M + v_i^{med} + \sum_{k \in N, k \neq n} X_k v_{com(i,k),k} \quad \forall i \in I_n^{ex} \quad (12)$$

$$\beta_{i,n} \leq (1 - \delta_{i,n})M \quad \forall i \in I_n^{ex} \quad (13)$$

$$v \in \mathbb{R}; v^{ut}, v^{ex}, ub \geq 0; \delta \in [0, 1]$$

For the purpose of finding the ESS or strong Nash equilibria, an community level objective function can be added, usually it is the sum of biomass of all community members:  $\max \sum_{n \in N} (c_n V_n)$ , and this community level objective is added to NECom for the predictions in this paper.

## NECom prediction can guarantee Nash Equilibrium

In the context of microbial games, Nash equilibrium (NE) is a state where there is no benefit for any community member to unilaterally deviate from its current strategies [5, 68]. To prove whether a NECom prediction can guarantee Nash equilibrium, firstly one member is picked and the fluxes (strategies) of other members are fixed, so that any deviation of current flux distribution of the picked member can be

'unilateral', then we check if NECom predicted flux distribution for the picked member can be optimal, taking steps along these paths, we have the following proof:

According to its inner problems of the NECom framework, when the strategies of other members are fixed, any member  $k \in N$  in the community model has the following optimization formulation:

$$\begin{aligned} & \max v_k^{biomass} \\ & \text{subject to} \\ & \sum_{j \in J_k} S_{i,j,k} v_{j,k} = 0, \quad \forall i \in I^k \end{aligned} \quad (14)$$

$$LB_{j,k} \leq v_{j,k} \leq UB_{j,k}, \quad \forall j \in J^k \quad (15)$$

$$v_{com(i,k),k} = v_{com(i,k),k}^{ex} - v_{com(i,k),k}^{ut} \geq -\beta_{com(i,k),k}/X_k + v_{com(i,k),k}^{ex} \quad \forall i \in I_k^{ex} \quad (16)$$

$$v \in \mathbb{R}; v^{ex} \geq 0$$

If metabolites  $i$  can not be net synthesized by other species, then according to eq. (8),  $\beta_{com(i,k),k}$  is 0, and eq. (16) can be reduced to

$$v_{com(i,k),k} = v_{com(i,k),k}^{ex} - v_{com(i,k),k}^{ut} \geq v_{com(i,k),k}^{ex} \quad \text{or} \quad (16)$$

$$v_{com(i,k),k} = v_{com(i,k),k}^{ex} \quad \text{and} \quad v_{com(i,k),k}^{ut} = 0 \quad (17)$$

Obviously the above constraints do not have any effect on flux distribution of member  $k$ .

On the other hand if metabolites  $i$  can be net synthesized by other species, then according to eq. (8),  $\beta_{com(i,k),k}$  is a fixed positive value,  $X_k$  is also fixed,  $v_{com(i,k),k}^{ex}$  is a non-negative variable that does not present elsewhere, therefore eq. (16) becomes effectively equivalent to

$$v_{com(i,k),k} \geq \beta_{com(i,k),k}/X_k \quad (18)$$

which are simple substrate availability constraints that do not fix any exchange flux. In either aforementioned NECom is able to predict the optimal strategies (flux distributions) of member  $k$ , while it preserves its autonomy in an environmental conditions shaped by other species. Now we proved that NECom predictions can guarantee Nash equilibrium.



## Application of NECom to classical Games in Ecology

137

Consider scenario 1 where a simplest toy community model consist of two individual species (or mutants) with equal abundance named sp1 and sp2 (fig. 2). Each species can yield ATP through converting substrate S (assumed to be sufficient) to intermediate P and subsequently consume ATP though converting P to biomass precursors A and B, which are freely exchanged between the two species. The difference between them is that sp1 produces B more efficiently (consuming 1 ATP vs. 3 ATP for sp2), while sp2 produces A more efficiently (consuming 1 ATP versus 3 ATP for sp1), reflecting the existence of variable pathway yields commonly observed in nature. Intuitively the optimal strategy for the community is that each species cross feeds each other with the metabolites produced with higher efficiency, i.e sp1 supplies B to sp2, while sp2 feeds A to sp1, coinciding with the prediction of joint-FBA and OptCom (they predict same results in this case, see (fig. 2 a)). However, it is not a NE since either species, say sp1, can have a mutant that does not excrete B but keeps consuming A and increases the overall biomass production. In contrast, NECom predicts that the two species will grow at a lower rate and exchange nothing (fig. 2.b). Since there is no way for each species to grow faster given no export by another species, this is a NE. In analogy to classical matrix game, the payoff matrix corresponding to different crossfeeding states (fig. 3: a) was constructed with FshaP method, the crossfeeding state will migrate from one to another according to the current payoff matrix, which may also be updated after the migration. The payoff matrix indicates that maximum growth without cross feeding ([00, 00]) is the (strict) NE as well as evolutionary stable strategy (ESS), which is a NE not invadable by other mutants (strategies). Any other strategy combinations including the complementary crossfeedings ([01,10]) predicted by Joint-FBA/OptCom are not stable and will eventually evolve to the NE, no matter what the current crossfeeding state might be, it will eventually migrate to non-crossfeeding state since which is stable (fig. 3.b).

138

139

140

141

142

143

144

145

146

147

148

149

150

151

152

153

154

155

156

157

158

based on the analysis above, the interaction in (fig. 2) is characterized as a game called 'prisoner dilemma', because the NE is all members choosing 'defect' instead of 'cooperate', which NECom correctly predicts. The 'forced altruism' setup is the cause for the mutualistic prediction by joint-FBA and OptCom, because the setup artificially prioritizes the metabolite export by each member for its partner over the optimization of its fitness, in order to achieve higher community-level fitness.

159

160

161

162

163

In the previous toy community both members are self-sufficient, what if members must depend on each other for survival? In scenario 2, sp2 is set to depend on sp1 for its removal of the growth-inhibitory product 'C', which can not be withdrew efficiently from the system but needed by sp1 to generate ATP for growth (fig. 4). This model is an epitome of the interaction between *M. maripaludis* and *D. vulgaris* [57,58], in which *Methanococcus* consumes the growth-requiring hydrogen produced by and meanwhile inhibitive to *D. vulgaris*.

164

165

166

167

168

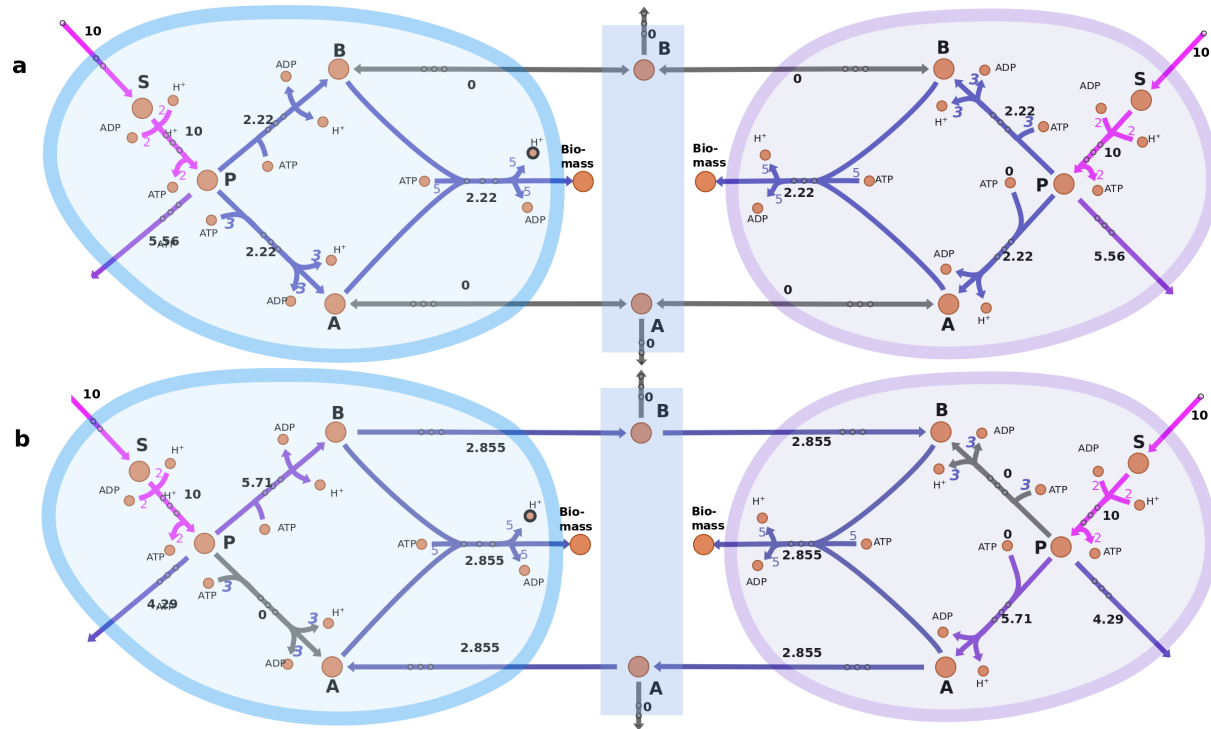

**Figure 2.** Scenario 1: Flux distributions predicted for a toy model by (a) NECom and (b) joint-FBA/OptCom. The toy community model consists of two species, both capable of producing biomass precursors a and b, but at different ATP costs.

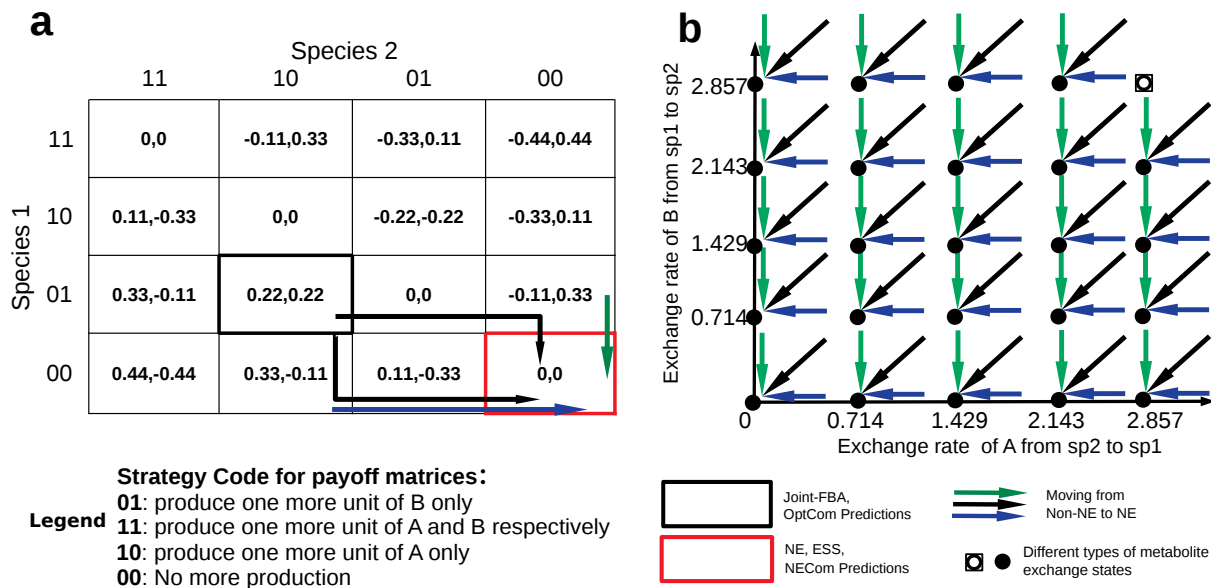

**Figure 3.** Formulation of the payoff matrix for the toy model in fig. 2. (a) The payoff matrix. Arrows indicate how the two species change their strategies from a Non-NE to the NE. (b) Moving path of interaction strategies between different crossfeeding states

The NE predicted by NECom shows that sp2 will produce C as much as possible and both species can grow. 169  
The case demonstrates a type of mutualism resulting from coupled growth. 170

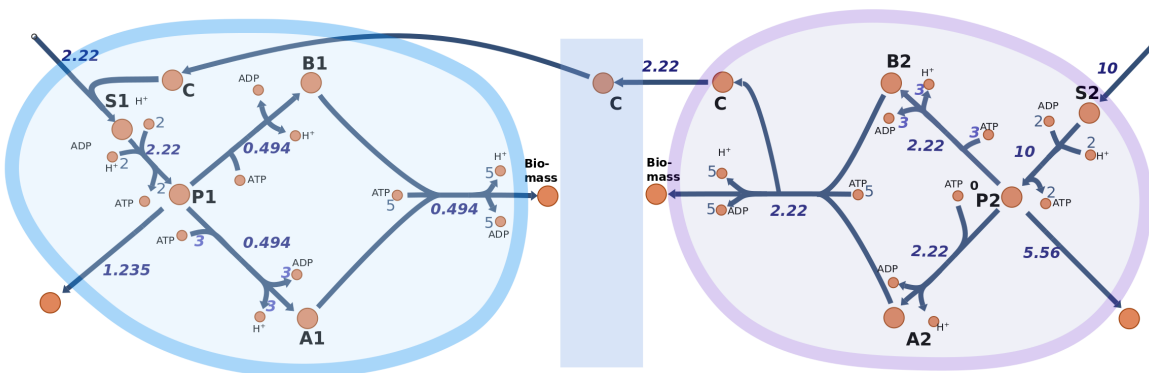

**Figure 4.** Scenario 2, growth coupled symbiosis with NECom predicted fluxes

It is intuitive that the previous scenario will result at mutualism. What if the metabolite production is not 171  
growth coupled? In scenario 3, we use the same setup as in scenario 1 but remove the reaction for 172  
synthesizing metabolite A in sp1 and the reaction for synthesizing B for sp2 (fig. 5 a), then would 173  
cooperation become favorable or would defect still be the outcome despite no growth? This mutualist-cheater 174  
scenario is a classical question of interest in ecology [10–12, 41, 56]. The payoff matrix (fig. 5 b) shows that 175  
four strategy combinations (i.e the mutualism, two commensalisms, and non-crossfeeding) are NE, but 176  
mutualism is the ESS and there is no strict NE. Therefore from evolutionary game theory, the non-producing 177  
cheaters in this case can still co-exist with producer although not being able to outgrow them. This is another 178  
example to explain why mutualism or commensalism are possible even if it costs members some resource: 179  
because when a particular metabolite is not growth limiting, exporting the metabolite does not penalize the 180  
organism's fitness. 181

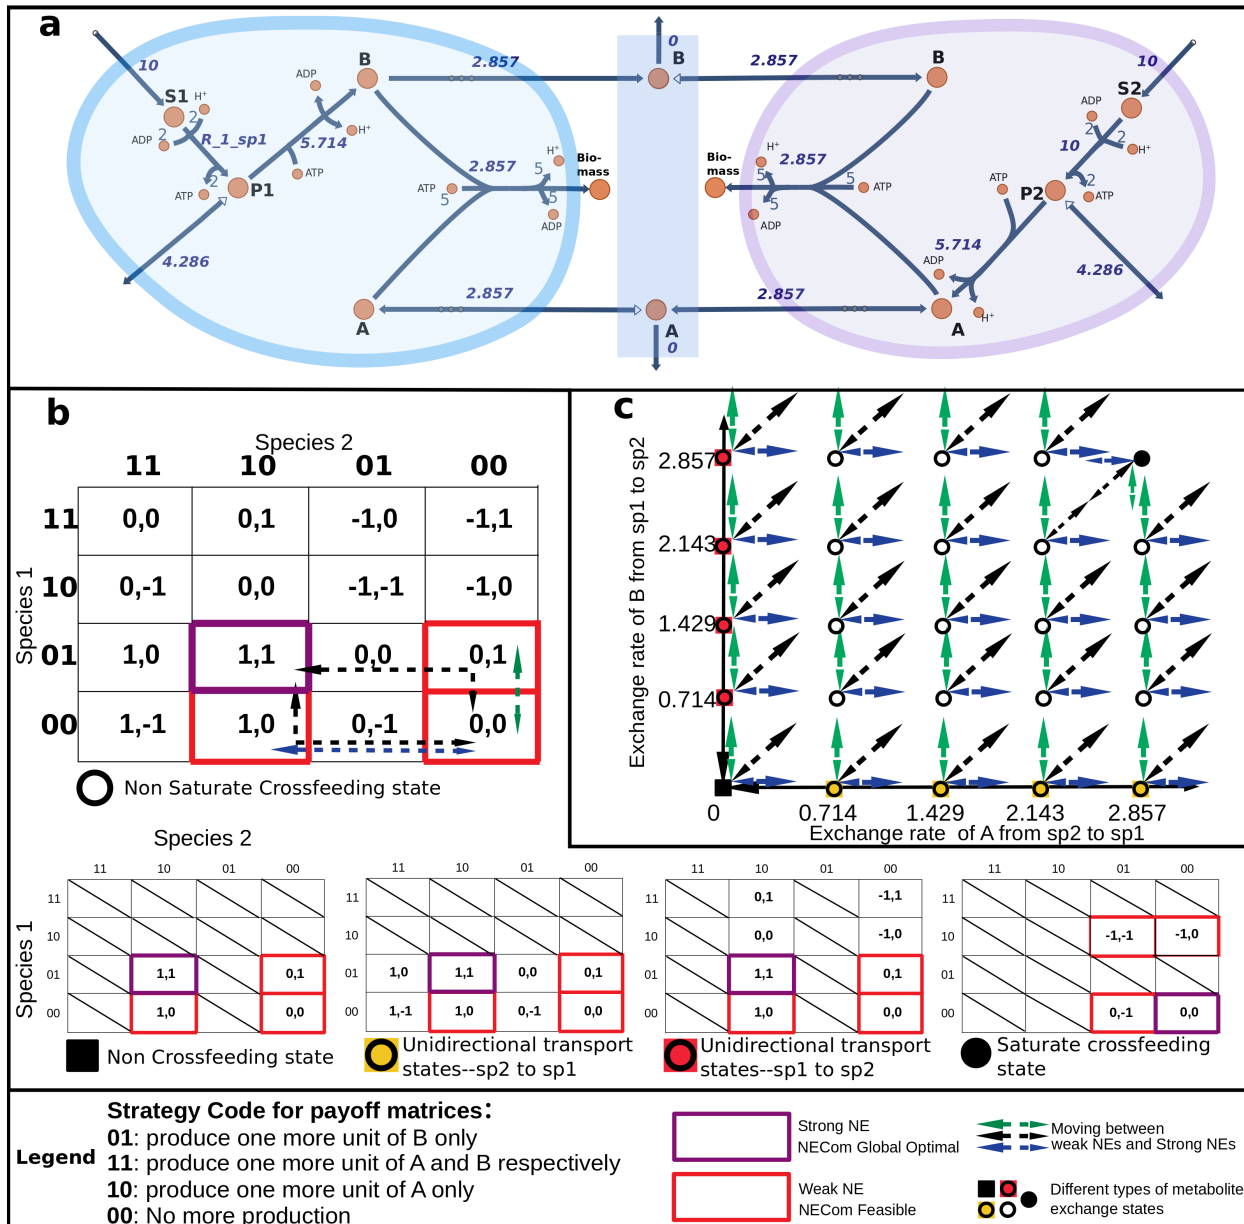

**Figure 5.** NECom results and payoff matrix for scenario 3 (a): toy community model for scenario 3 and NECom predicted fluxes (b): Representative payoff matrices for different types of metabolite exchange states, payoffs are from FShaP prediction, strong and weak Nash equilibria highlighted, the box with slash indicates the corresponding strategies are infeasible (c)Map for the migration path of strategies, according to payoff matrices

## Conclusion and outlook

For the purpose of seeking the ruling principles that governs the microbial inter-cellular interaction, we developed an bi-level algorithm called 'NECom' to predict the Nash equilibrium of multiple species' interactive game at metabolic level. In order to compare NECom prediction with those obtained from traditional game theory analysis, a method termed 'FShaP' is proposed to construct the payoff table of

inter-species metabolic interaction with the shadow price obtained in FBA solution of metabolic model, 187  
providing with a simple toy community model, NECom is proved to guarantee its predicted microbial 188  
interactions being Nash equilibria that previous methods' predictions cannot guarantee, the main reason for 189  
this difference is that NECom does not contains 'forced altruism' setup that computationally force individual 190  
species fulfill other species's metabolic need before its own. Being consistent with the predictions obtained by 191  
traditional game theory approach, NECom is demonstrated to be able to predict classical games including 192  
prisons' dilemma and cooperative games. 193

The two method proposed in the paper, FShap and NECom are functional complementary, although FShap 194  
can be generalizable to more than two exchanging metabolites, however with increasing exchanging 195  
metabolites, the solution space will explosively increase, causing difficulty/inefficiency in enumeration of all 196  
Nash equilibria and finding strong Nash equilibria and ESS, especially when genome scale metabolic models 197  
are used in the computing. NECom, utilizing modern mixed integer programming technology, is able to 198  
efficiently search Nash equilibria for large scale and complex systems, however it does not predict the 199  
strategies' migration(might be called 'co-evolution') path that can be reveal by FShap approach, these two 200  
method are developed to bridge traditional evolutionary game theory and metabolic models for in-depth 201  
analysis of inter-cellular interactions. 202

In the future, FShap and NECom will be applied to some real-world case studies,higher level microbial 203  
interactions such as quorum sensing and host-microbe signaling can be considered in the form of additional 204  
constraints, kinetic parameters can be added and NECom can be adjusted for spatial-tempo simulation, 205  
various inner problem objectives can be evaluated for specific case studies. more comprehensive and better 206  
refined model can be used to improve prediction quality if computational difficulties can be well handled, 207  
multi-level omics data can be integrated in the framework to improve case specific predictions. 208

## Acknowledgments 209

We acknowledge Dr. Wenyan Yuan,Dr. Guang Cheng, Dr.Xueying Ni and Ying Zhu for their useful  
comments

## Author Contributions

Supervision: Tianwei Tan and Siu Hung Joshua Chan

Conceptualization: Jingyi Cai and Siu Hung Joshua Chan

Methodology: Jingyi Cai and Siu Hung Joshua Chan

Hardware provision: Tianwei Tan

Visualization: Jingyi Cai

Writing-original draft: Jingyi Cai and Siu Hung Joshua Chan

Writing-review and editing: Siu Hung Joshua Chan, Tianwei Tan and Jingyi Cai

## References

1. W.-R. Abraham. Applications and impacts of stable isotope probing for analysis of microbial interactions. Applied Microbiology and Biotechnology, 98(11):4817–4828, apr 2014.
2. C. Adami, J. Schossau, and A. Hintze. Evolution and stability of altruist strategies in microbial games. Physical Review E, 85(1), jan 2012.
3. E. Bauer, J. Zimmermann, F. Baldini, I. Thiele, and C. Kaleta. BacArena: Individual-based metabolic modeling of heterogeneous microbes in complex communities. PLOS Computational Biology, 13(5):e1005544, may 2017.
4. C. T. Bergstrom and M. Lachmann. The red king effect: When the slowest runner wins the coevolutionary race. Proceedings of the National Academy of Sciences, 100(2):593–598, jan 2003.
5. M. J. Blaser and D. Kirschner. The equilibria that allow bacterial persistence in human hosts. Nature, 449(7164):843–849, oct 2007.
6. S. H. J. Chan, J. Cai, L. Wang, M. N. Simons-Senftle, and C. D. Maranas. Standardizing biomass reactions and ensuring complete mass balance in genome-scale metabolic models. Bioinformatics, 33(22):3603–3609, jul 2017.
7. Z. Chen, X. Sun, Y. Li, Y. Yan, and Q. Yuan. Metabolic engineering of escherichia coli for microbial synthesis of monolignols. Metabolic Engineering, 39:102–109, jan 2017.
8. G. D’Souza and C. Kost. Experimental evolution of metabolic dependency in bacteria. PLOS Genetics, 12(11):e1006364, nov 2016.
9. G. P. Dubey and S. Ben-Yehuda. Intercellular nanotubes mediate bacterial communication. Cell, 144(4):590–600, feb 2011.
10. S. Estrela and I. Gudelj. Evolution of cooperative cross-feeding could be less challenging than originally thought. PLoS ONE, 5(11):e14121, nov 2010.

11. R. Ferriere, J. L. Bronstein, S. Rinaldi, R. Law, and M. Gauduchon. Cheating and the evolutionary stability of mutualisms. Proceedings of the Royal Society of London. Series B: Biological Sciences, 269(1493):773–780, apr 2002.
12. R. Ferrière, M. Gauduchon, and J. L. Bronstein. Evolution and persistence of obligate mutualists and exploiters: competition for partners and evolutionary immunization. Ecology Letters, 10(2):115–126, feb 2007.
13. F. Fiegna, A. Moreno-Letelier, T. Bell, and T. G. Barraclough. Evolution of species interactions determines microbial community productivity in new environments. The ISME Journal, 9(5):1235–1245, nov 2014.
14. S. Freilich, R. Zarecki, O. Eilam, E. S. Segal, C. S. Henry, M. Kupiec, U. Gophna, R. Sharan, and E. Ruppín. Competitive and cooperative metabolic interactions in bacterial communities. Nature Communications, 2:589, dec 2011.
15. E. Frey. Evolutionary game theory: Theoretical concepts and applications to microbial communities. Physica A: Statistical Mechanics and its Applications, 389(20):4265–4298, oct 2010.
16. N. A. Gebreselassie and M. R. Antoniewicz. 13 c-metabolic flux analysis of co-cultures: A novel approach. Metabolic Engineering, 31:132–139, sep 2015.
17. J. A. Gilbert, R. A. Quinn, J. Debelius, Z. Z. Xu, J. Morton, N. Garg, J. K. Jansson, P. C. Dorrestein, and R. Knight. Microbiome-wide association studies link dynamic microbial consortia to disease. Nature, 535(7610):94–103, jul 2016.
18. J. A. Gomez, K. Höffner, and P. I. Barton. DFBAlab: a fast and reliable MATLAB code for dynamic flux balance analysis. BMC Bioinformatics, 15(1), dec 2014.
19. J. Gore, H. Youk, and A. van Oudenaarden. Snowdrift game dynamics and facultative cheating in yeast. Nature, 459(7244):253–256, apr 2009.
20. T. J. Hanly and M. A. Henson. Dynamic flux balance modeling of microbial co-cultures for efficient batch fermentation of glucose and xylose mixtures. Biotechnol Bioeng, 108(2):376–85, 2011.
21. W. R. Harcombe, W. J. Riehl, I. Dukovski, B. R. Granger, A. Betts, A. H. Lang, G. Bonilla, A. Kar, N. Leiby, P. Mehta, C. J. Marx, and D. Segre. Metabolic resource allocation in individual microbes determines ecosystem interactions and spatial dynamics. Cell Rep, 7(4):1104–15, 2014.

22. A. Heinken, S. Sahoo, R. M. T. Fleming, and I. Thiele. Systems-level characterization of a host-microbe metabolic symbiosis in the mammalian gut. Gut Microbes, 4(1):28–40, jan 2013.
23. A. Heinken and I. Thiele. Anoxic conditions promote species-specific mutualism between gut MicrobesIn silico. Applied and Environmental Microbiology, 81(12):4049–4061, apr 2015.
24. A. Heinken and I. Thiele. Systematic prediction of health-relevant human-microbial co-metabolism through a computational framework. Gut Microbes, 6(2):120–130, mar 2015.
25. M. Henson and P. Phalak. Byproduct cross feeding and community stability in an in silico biofilm model of the gut microbiome. Processes, 5(4):13, mar 2017.
26. M. A. Henson and P. Phalak. Microbiota dysbiosis in inflammatory bowel diseases: in silico investigation of the oxygen hypothesis. BMC Systems Biology, 11(1), dec 2017.
27. M. A. Henson and P. Phalak. Suboptimal community growth mediated through metabolite crossfeeding promotes species diversity in the gut microbiota. PLOS Computational Biology, 14(10):e1006558, oct 2018.
28. K. L. Hillesland, S. Lim, J. J. Flowers, S. Turkarslan, N. Pinel, G. M. Zane, N. Elliott, Y. Qin, L. Wu, N. S. Baliga, J. Zhou, J. D. Wall, and D. A. Stahl. Erosion of functional independence early in the evolution of a microbial mutualism. Proceedings of the National Academy of Sciences, 111(41):14822–14827, sep 2014.
29. K. L. Hillesland and D. A. Stahl. Rapid evolution of stability and productivity at the origin of a microbial mutualism. Proceedings of the National Academy of Sciences, 107(5):2124–2129, jan 2010.
30. S. Hummert, K. Bohl, D. Basanta, A. Deutsch, S. Werner, G. Theißen, A. Schroeter, and S. Schuster. Evolutionary game theory: cells as players. Mol. BioSyst., 10(12):3044–3065, 2014.
31. T. Kaeberlein. Isolating "uncultivable" microorganisms in pure culture in a simulated natural environment. Science, 296(5570):1127–1129, may 2002.
32. Y. Kallus, J. H. Miller, and E. Libby. Paradoxes in leaky microbial trade. Nature Communications, 8(1), nov 2017.
33. N. Kamada, G. Y. Chen, N. Inohara, and G. Núñez. Control of pathogens and pathobionts by the gut microbiota. Nature Immunology, 14(7):685–690, jun 2013.



34. S. Kato, S. Haruta, Z. J. Cui, M. Ishii, and Y. Igarashi. Stable coexistence of five bacterial strains as a cellulose-degrading community. Applied and Environmental Microbiology, 71(11):7099–7106, nov 2005.
35. R. A. Khandelwal, B. G. Olivier, W. F. M. Röling, B. Teusink, and F. J. Bruggeman. Community flux balance analysis for microbial consortia at balanced growth. PLoS ONE, 8(5):e64567, may 2013.
36. T. Y. Kim, S. B. Sohn, Y. B. Kim, W. J. Kim, and S. Y. Lee. Recent advances in reconstruction and applications of genome-scale metabolic models. Current Opinion in Biotechnology, 23(4):617–623, aug 2012.
37. D. Lawrence, F. Fiegna, V. Behrends, J. G. Bundy, A. B. Phillimore, T. Bell, and T. G. Barraclough. Species interactions alter evolutionary responses to a novel environment. PLoS Biology, 10(5):e1001330, may 2012.
38. Y. Liu, M. Ding, W. Ling, Y. Yang, X. Zhou, B.-Z. Li, T. Chen, Y. Nie, M. Wang, B. Zeng, X. Li, H. Liu, B. Sun, H. Xu, J. Zhang, Y. Jiao, Y. Hou, H. Yang, S. Xiao, Q. Lin, X. He, W. Liao, Z. Jin, Y. Xie, B. Zhang, T. Li, X. Lu, J. Li, F. Zhang, X.-L. Wu, H. Song, and Y.-J. Yuan. A three-species microbial consortium for power generation. Energy & Environmental Science, 10(7):1600–1609, 2017.
39. S. Magnúsdóttir, A. Heinken, L. Kutt, D. A. Ravcheev, E. Bauer, A. Noronha, K. Greenhalgh, C. Jäger, J. Baginska, P. Wilmes, R. M. T. Fleming, and I. Thiele. Generation of genome-scale metabolic reconstructions for 773 members of the human gut microbiota. Nature Biotechnology, 35(1):81–89, nov 2016.
40. J. P. McCutcheon and N. A. Moran. Parallel genomic evolution and metabolic interdependence in an ancient symbiosis. Proceedings of the National Academy of Sciences, 104(49):19392–19397, nov 2007.
41. F. Medaney, T. Dimitriu, R. J. Ellis, and B. Raymond. Live to cheat another day: bacterial dormancy facilitates the social exploitation of  $\beta$ -lactamases. The ISME Journal, 10(3):778–787, oct 2015.
42. G. L. Medlock, M. A. Carey, D. G. McDuffie, M. B. Mundy, N. Giallourou, J. R. Swann, G. L. Kolling, and J. A. Papin. Inferring metabolic mechanisms of interaction within a defined gut microbiota. Cell Systems, 7(3):245–257.e7, sep 2018.
43. J. J. Minty, M. E. Singer, S. A. Scholz, C.-H. Bae, J.-H. Ahn, C. E. Foster, J. C. Liao, and X. N. Lin. Design and characterization of synthetic fungal-bacterial consortia for direct production of isobutanol from cellulosic biomass. Proceedings of the National Academy of Sciences, 110(36):14592–14597, aug 2013.

44. T. J. Moutinho, J. C. Panagides, M. B. Biggs, G. L. Medlock, G. L. Kolling, and J. A. Papin. Novel co-culture plate enables growth dynamic-based assessment of contact-independent microbial interactions. *PLOS ONE*, 12(8):e0182163, aug 2017.
45. J. D. Orth, I. Thiele, and B. O. Palsson. What is flux balance analysis? *Nature Biotechnology*, 28(3):245–248, mar 2010.
46. A. R. Pacheco, M. Moel, and D. Segre. Costless metabolic secretions as drivers of interspecies interactions in microbial ecosystems. apr 2018.
47. S. Pande and C. Kost. Bacterial unculturability and the formation of intercellular metabolic networks. *Trends in Microbiology*, 25(5):349–361, may 2017.
48. S. Pande, S. Shitut, L. Freund, M. Westermann, F. Bertels, C. Colesie, I. B. Bischofs, and C. Kost. Metabolic cross-feeding via intercellular nanotubes among bacteria. *Nature Communications*, 6, 2015.
49. S. Paterson, T. Vogwill, A. Buckling, R. Benmayor, A. J. Spiers, N. R. Thomson, M. Quail, F. Smith, D. Walker, B. Libberton, A. Fenton, N. Hall, and M. A. Brockhurst. Antagonistic coevolution accelerates molecular evolution. *Nature*, 464(7286):275–278, feb 2010.
50. V. H. Pham and J. Kim. Cultivation of unculturable soil bacteria. *Trends in Biotechnology*, 30(9):475–484, sep 2012.
51. S. Schuster, J.-U. Kreft, A. Schroeter, and T. Pfeiffer. Use of game-theoretical methods in biochemistry and biophysics. *Journal of Biological Physics*, 34(1-2):1–17, apr 2008.
52. S. Shoaie, P. Ghaffari, P. Kovatcheva-Datchary, A. Mardinoglu, P. Sen, E. Pujos-Guillot, T. de Wouters, C. Juste, S. Rizkalla, J. Chilloux, L. Hoyles, J. K. Nicholson, M. I.-O. Consortium, J. Dore, M. E. Dumas, K. Clement, F. Backhed, and J. Nielsen. Quantifying diet-induced metabolic changes of the human gut microbiome. *Cell Metab*, 22(2):320–31, 2015.
53. F. Sommer, J. M. Anderson, R. Bharti, J. Raes, and P. Rosenstiel. The resilience of the intestinal microbiota influences health and disease. *Nature Reviews Microbiology*, 15(10):630–638, jun 2017.
54. S. Stolyar, S. Van Dien, K. L. Hillesland, N. Pinel, T. J. Lie, J. A. Leigh, and D. A. Stahl. Metabolic modeling of a mutualistic microbial community. *Mol Syst Biol*, 3:92, 2007.
55. D. Vandeputte, G. Kathagen, K. D’hoel, S. Vieira-Silva, M. Valles-Colomer, J. Sabino, J. Wang, R. Y. Tito, L. D. Commer, Y. Darzi, S. Vermeire, G. Falony, and J. Raes. Quantitative microbiome profiling links gut community variation to microbial load. *Nature*, nov 2017.

56. A. J. Waite and W. Shou. Adaptation to a new environment allows cooperators to purge cheaters stochastically. Proceedings of the National Academy of Sciences, 109(47):19079–19086, oct 2012.
57. C. B. Walker, Z. He, Z. K. Yang, J. A. Ringbauer, Q. He, J. Zhou, G. Voordouw, J. D. Wall, A. P. Arkin, T. C. Hazen, S. Stolyar, and D. A. Stahl. The electron transfer system of syntrophically grown *desulfovibrio vulgaris*. Journal of Bacteriology, 191(18):5793–5801, jul 2009.
58. C. B. Walker, A. M. Redding-Johanson, E. E. Baidoo, L. Rajeev, Z. He, E. L. Hendrickson, M. P. Joachimiak, S. Stolyar, A. P. Arkin, J. A. Leigh, J. Zhou, J. D. Keasling, A. Mukhopadhyay, and D. A. Stahl. Functional responses of methanogenic archaea to syntrophic growth. The ISME Journal, 6(11):2045–2055, jun 2012.
59. Y. Wang, Y. Song, Y. Tao, H. Muhamadali, R. Goodacre, N.-Y. Zhou, G. M. Preston, J. Xu, and W. E. Huang. Reverse and multiple stable isotope probing to study bacterial metabolism and interactions at the single cell level. Analytical Chemistry, 88(19):9443–9450, sep 2016.
60. S. Wilken, M. Saxena, L. Petzold, and M. O’Malley. In silico identification of microbial partners to form consortia with anaerobic fungi. Processes, 6(1):7, jan 2018.
61. A. Zelezniak, S. Andrejev, O. Ponomarova, D. R. Mende, P. Bork, and K. R. Patil. Metabolic dependencies drive species co-occurrence in diverse microbial communities. Proc Natl Acad Sci U S A, 112(20):6449–54, 2015.
62. C. Zhang, M. Derrien, F. Levenez, R. Brazeilles, S. A. Ballal, J. Kim, M.-C. Degivry, G. Quéré, P. Garault, J. E. T. van Hylckama Vlieg, W. S. Garrett, J. Doré, and P. Veiga. Ecological robustness of the gut microbiota in response to ingestion of transient food-borne microbes. The ISME Journal, 10(9):2235–2245, sep 2016.
63. Z. Zhang, H. Ji, G. Gong, X. Zhang, and T. Tan. Synergistic effects of oleaginous yeast *rhodotorula glutinis* and microalga *chlorella vulgaris* for enhancement of biomass and lipid yields. Bioresour Technol, 164:93–9, 2014.
64. K. Zhou, K. Qiao, S. Edgar, and G. Stephanopoulos. Distributing a metabolic pathway among a microbial consortium enhances production of natural products. Nature Biotechnology, 33(4):377–383, jan 2015.
65. K. Zhuang, M. Izallalen, P. Mouser, H. Richter, C. Risso, R. Mahadevan, and D. R. Lovley. Genome-scale dynamic modeling of the competition between *rhodoferrax* and *geobacter* in anoxic subsurface environments. The ISME Journal, 5(2):305–316, jul 2010.

66. A. R. Zomorodi and C. D. Maranas. OptCom: A multi-level optimization framework for the metabolic modeling and analysis of microbial communities. PLoS Computational Biology, 8(2):e1002363, feb 2012.
67. A. R. Zomorodi and D. Segrè. Genome-driven evolutionary game theory helps understand the rise of metabolic interdependencies in microbial communities. Nature Communications, 8(1), nov 2017.
68. A. R. Zomorodi and D. Segrè. Genome-driven evolutionary game theory helps understand the rise of metabolic interdependencies in microbial communities. Nature Communications, 8(1), nov 2017.
69. T. R. Zuroff, S. B. Xiques, and W. R. Curtis. Consortia-mediated bioprocessing of cellulose to ethanol with a symbiotic clostridium phytofermentans/yeast co-culture. Biotechnology for biofuels, 6:59, Apr. 2013.
